# Supplementary material for: Multilocus Bayesian Estimates of Intra-Oceanic Genetic Differentiation, Connectivity, and Admixture in Atlantic Swordfish (Xiphias gladius L.)
Source: PLoS One. 2015 Jun 9;10(6):e0127979. doi: 10.1371/journal.pone.0127979 (PMC4461265; doi:10.1371/journal.pone.0127979)
Supplement: S2 Table — A consensus power of assignment for each locus using WHICHLOCI v.1.0 between North Atlantic (n = 207) and Mediterranean (n = 142) swordfish inferred in STRUCTURE v2.3. (XLS) [file pone.0127979.s005.xls]

## Sheet: Sheet1
Table S2. A consensus power of assignment for each locus using WHICHLOCI v.1.0 between North Atlantic (n=207) and Mediterranean (n=142) swordfish inferred in STRUCTURE v2.3.
Rank	Locus	Score	% (Relative Score)
1	Mlc2	0.3059	18.8959
2	ATPsβ	0.2611	16.1321
3	Act2a	0.182	11.2466
4	LDHA	0.176	10.8756
5	ANT	0.1713	10.5845
6	ALDB	0.1377	8.5069
7	SRP54	0.1371	8.4701
8	ARP	0.1192	7.3614
9	GpHR	0.0649	4.0112
10	CaM	0.6934	3.9156
